# Supplementary material
Source: PubMed Central journal article supplement (PMC2957766)
Supplement: 97320630004320S1.pdf [file 97320630004320S1.pdf]

Supplementary material

**Table 1: Details of predicted conserved protein domains & motifs found in protein sequences of putative enzymes involved in vanillin bioconversion in both *P. fluorescens* and *A. niger*.**

| S. No. | Reference Enzymes of Vanillin Biosynthetic Pathway | Reference Pathway protein in <i>P. fluorescens</i> with protein ID & Length | Predicted Pathway protein in <i>A. niger</i> with protein ID, Length & BLAST score                                                         | Conserved protein domain & motif                                         | Conserved domain/motif Function                                                                                                                                                                                                   |
|--------|----------------------------------------------------|-----------------------------------------------------------------------------|--------------------------------------------------------------------------------------------------------------------------------------------|--------------------------------------------------------------------------|-----------------------------------------------------------------------------------------------------------------------------------------------------------------------------------------------------------------------------------|
| 1.     | Eugenol hydroxylase A (EhyA)                       | Eugenol hydroxylase cytochrome C<br>EMB CP000076<br>111 aa                  | CYC-A<br>(Cytochrome c)<br>P56205<br>A61490<br>111 aa<br>(87.4 score, 58% similarity, 38% identity, 4E-19 E-value)                         | PS51007<br>IPR003088<br>PF00034                                          | Cytochrome-C motif                                                                                                                                                                                                                |
|        | Eugenol hydroxylase B (Ehy B)                      | Eugenol hydroxylase B<br>CAB64355<br>AJ243941<br>517 aa                     | Hypothetical protein (An09g01380)<br>XP_001393455<br>XM_001393418<br>552 aa<br>(283 score, 50% similarity, 34% identity, 4.00E-77 E-value) | PFAM01565<br>PFAM 02913<br>COG0277                                       | FAD_binding_4, FAD binding domain<br>FAD-oxidase C, FAD linked oxidases, C-terminal domain<br>GlcD, FAD/FMN-containing dehydrogenases                                                                                             |
| 2.     | Coniferyl alcohol dehydrogenase (Cal B)            | Coniferyl alcohol dehydrogenase<br>BAD11007                                 | Hypothetical protein (An15g01840)<br>XP_001396723<br>XM_001396686<br>280 aa<br>(63.2 score 41% similarity, 22% identity, 3.00E-10 E-value) | CL09931<br>IPR002198                                                     | AdoHcyase<br>IPR002198,short chain dehydrogenase/ reductase<br>Glucose/ribitol dehydrogenase<br>NAD(P)-binding                                                                                                                    |
|        |                                                    | AB162132<br>255 aa                                                          |                                                                                                                                            | IPR002347<br>IPR016040                                                   |                                                                                                                                                                                                                                   |
| 3.     | Coniferyl aldehyde dehydrogenase (CalA)            | Coniferyl aldehyde dehydrogenase<br>YP_262923<br>NC_004129<br>476 aa        | Hypothetical protein (An01g09260)<br>XP_0013896346<br>XM_001389309<br>500 aa<br>(238 score 53% similarity, 36% identity, 2.00-62 E-value)  | CL00545<br>PFAM00171<br>IPR015590<br>IPR016162<br>IPR012394<br>IPR016161 | LuxC, Acyl-CoA reductase (LuxC)<br>Aldedh, Aldehyde dehydrogenase family<br>Aldehyde dehydrogenase, N-terminal<br>Aldehyde dehydrogenase NAD(P)-dependent<br>Aldehyde/histidinol dehydrogenase<br>AMP-binding, AMP-binding enzyme |
| 4.     | Feruloyl CoA synthase (Fcs)                        | Feruloyl CoA synthase<br>AAZ23792 DQ119298<br>589 aa                        | AMP dependent CoA ligase<br>XP_001401186<br>XM_001401149<br>513 aa<br>(80.1 score 36% similarity, 24% identity, 8.00E-15 E-value)          | CL100401                                                                 |                                                                                                                                                                                                                                   |
| 5.     | Enoyl CoA hydratase/ aldolase (Ech)                | Enoyl CoA hydratase<br>AAZ23790<br>119298<br>276 aa                         | Hypothetical protein<br>XP_001399422<br>XM_001399385<br>294 aa<br>(108 score 50% similarity, 34% identity, 6.00E-24 E-value)               | CL109483                                                                 | Enoyl Co A hydratase/ isomerase family                                                                                                                                                                                            |
